# Supplementary material for: Nitrilases NIT1/2/3 Positively Regulate Flowering by Inhibiting MAF4 Expression in Arabidopsis
Source: PubMed Central journal article supplement (PMC9157433; doi:10.3389/fpls.2022.889460), 2022-05-17
Supplement: Data_Sheet_1.pdf [file Data_Sheet_1.pdf]

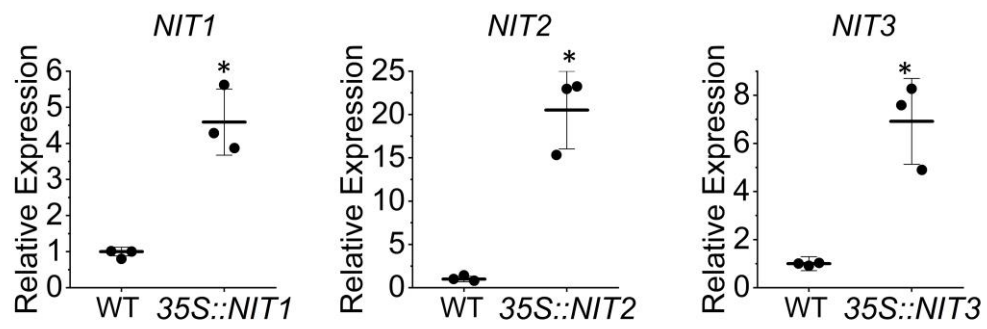

**Figure S1. Relative expression levels of *NIT1/2/3* in transgenic lines.** The error bars represent the standard error (three biological repeats). The asterisks at the top of the bar indicate significant differences between 35S::*NIT1/2/3* and wild type (WT),  $P < 0.05$ (\*) or  $P < 0.01$ (\*\*) by Student's *t* test.

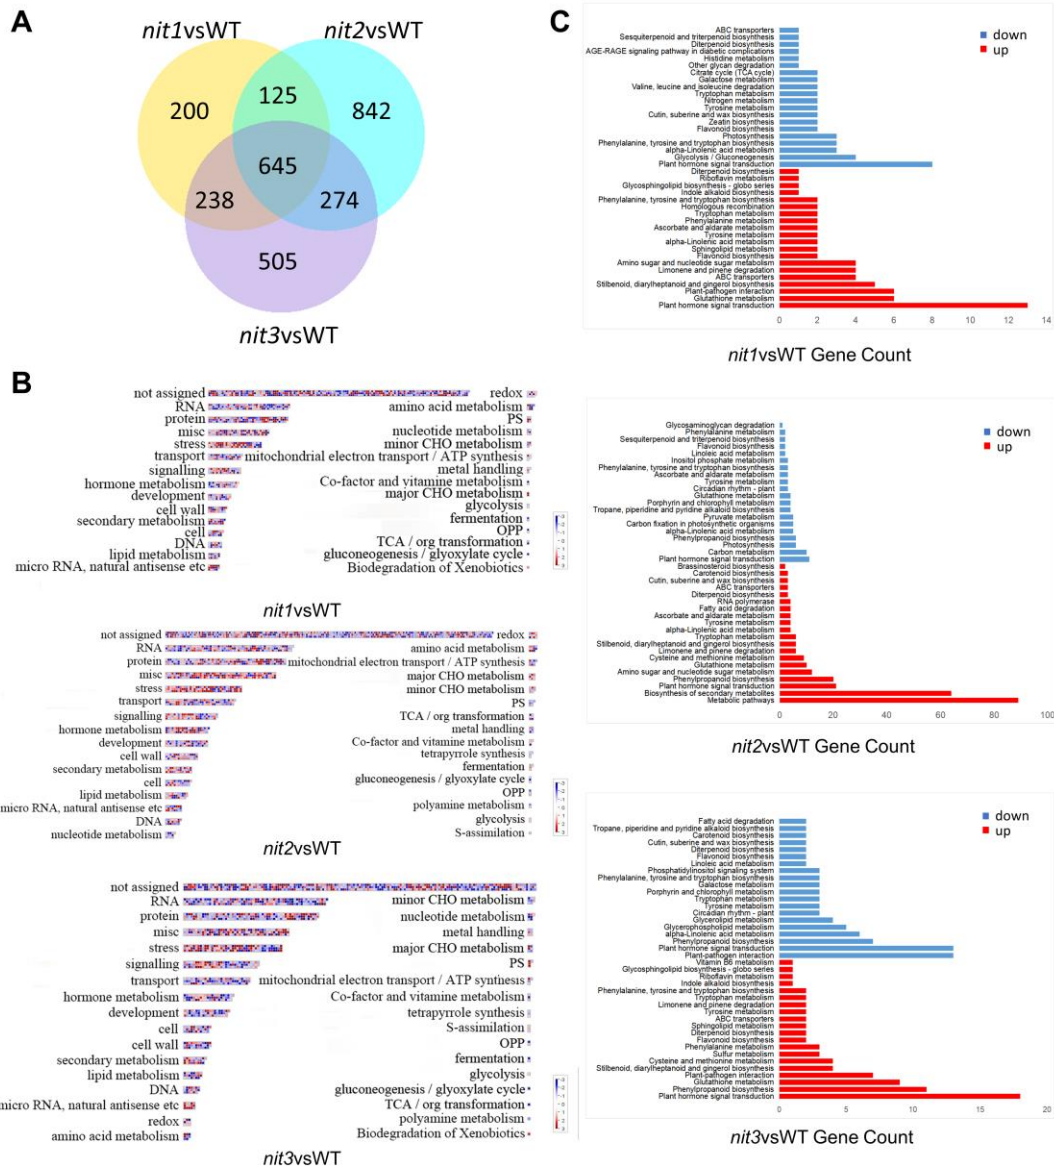

**Figure S2. Transcriptome analysis of *nit1/nit2/nit3* in Arabidopsis.** (A) Venn diagram showing overlapped differentially expressed genes (DEGs) between *nit1*, *nit2* and *nit3*. (B) GO enrichment analysis of the DEGs in *nit1/nit2/nit3* compared to wild type. Red squares represent up-regulated and blue squares represent down-regulated genes. (C) The top 40 (20 up-regulated, 20 down-regulated) enriched Kyoto Encyclopedia of Genes and Genomes (KEGG) pathway terms of DEGs.

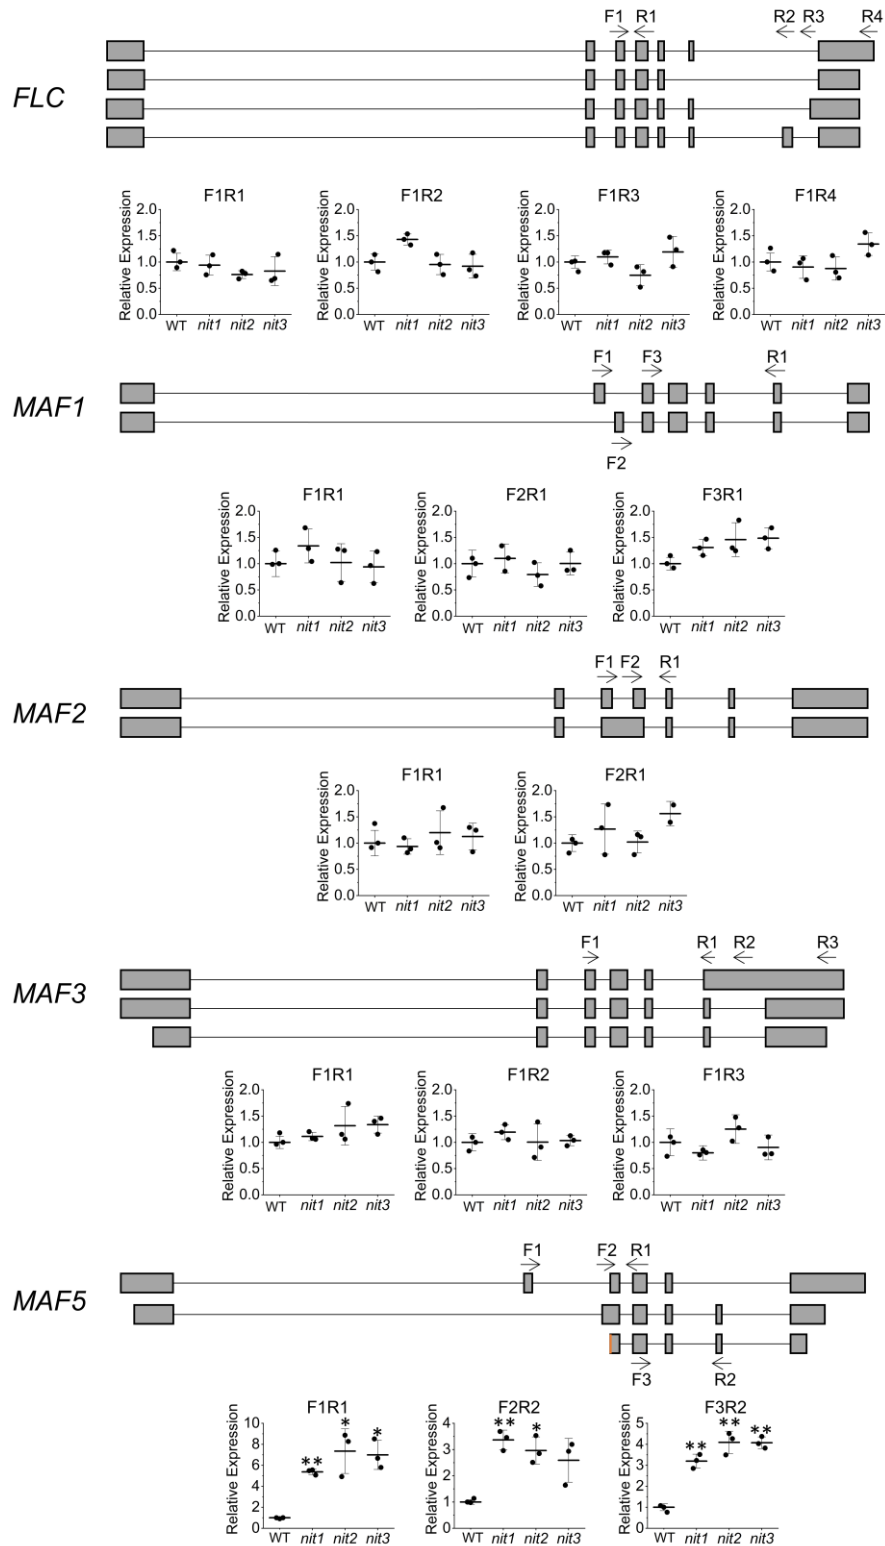

**Figure S3. Relative expression levels of *FLC*, *MAF1*, *MAF2*, *MAF3* and *MAF5* splicing variants.** Squares and lines represent exons and introns respectively. F means forward primer and R means reverse primer. Arrow indicates primer direction. The error bars represent the standard error (three biological repeats). The asterisks at the top of the bar indicate significant differences between *nit1/2/3* and wild type (WT),  $P < 0.05$ (\*) or  $P < 0.01$ (\*\*) by Student's *t* test.

**Supplemental Table 1. Sequences of primers used in this study**

| Name     | Sequence                       |
|----------|--------------------------------|
| NIT1-F   | ATGTCTAGTACTAAAGATATGTCAACTGTC |
| NIT1-R   | CTATTTGTTTGAGTCATCCTCAGC       |
| NIT2-F   | ATGTCAACTTCAGAAAACACTCC        |
| NIT2-R   | TTACTTGTTTGAGTCATCTTCCG        |
| NIT3-F   | ATGTCTAGTACTGAAGAAATGTCATCA    |
| NIT3-R   | CTATTTGTTTGATTCATCCTCTGC       |
| NIT1p-F  | AATCTTCTTTAGTTTTTATCTTAGGCT    |
| NIT1p-R  | CGAGTCTTTGTTTTTACTTTGG         |
| NIT2p-F  | GATTGAGTCGACAGTAATACGAGAC      |
| NIT2p-R  | ACTTGAGCTTTAGTCTTACTTCGAT      |
| NIT3p-F  | AATGTATTTGGCTTGTCTTGTGTC       |
| NIT3p-R  | ACTCGAGTCTTTGTTTTTACTTTTATAAC  |
| LBb1.3   | ATTTTGCCGATTCGGAAC             |
| nit1-L   | AAATAGGAGCCAAACTCACATTTTC      |
| nit1-R   | CGCTAAACCGAACCTAAAACC          |
| nit2-L   | TGAGATGGTATACCACGGATG          |
| nit2-R   | AAACGGGTATCTTTTCGGTTTG         |
| nit3-L   | GGTATTGCAGAACGAACC             |
| nit3-R   | GAGACTTGGGAGGCATT              |
| maf4-L   | TGATTACATATGCATGCGACC          |
| maf4-R   | TGAGTTATTGGGTCTCATGGG          |
| ACTIN2-F | TTACCCGATGGGCAAGTC             |
| ACTIN2-R | GCTCATAACGGTCAGCGATAC          |
| FKF1-F   | GGAGGGTGTGGAAGACAAGG           |
| FKF1-R   | AGAAGGTGTCGCTGAGAAGC           |
| TOC1-F   | ATCCACATTCCCTTGAGCGG           |
| TOC1-R   | TTTGGTGCAGAGAAACCCGA           |
| CDF3-F   | TTGGTCTCGAAGCTCAGCAG           |
| CDF3-R   | ACAAGCCGTTGATCCGCTAA           |
| CO-F     | TCCCCCGTAGCTCGTCTGTGGTA        |
| CO-R     | GCGTGCTCCGGCTGCTTTTT           |
| PHYA-F   | TGATTCAGCCCTTCGGTTGT           |
| PHYA-R   | GACGCACTAGGAGCAGTGAA           |
| FT-F     | CTAGCAACCCTCACCTCCGA           |
| FT-R     | TCGTAACACACAATCTCATTGCCAAA     |
| SOC1-F   | GCTCATTGATGGACTCGTACATAAGTTGGT |
| SOC1-R   | TTGACCAAACCTTCGCTTTCA          |
| AP1-F    | CCAGAGGCATTATCTTGGGGAAGACTTG   |
| AP1-R    | GCTCATTGATGGACTCGTACATAAGTTGGT |
| LFY-F    | TCATTTGCTACTCTCCGCCGCT         |
| LFY-R    | CATTTTTCGCCACGGTCTTTAG         |

|              |                                        |
|--------------|----------------------------------------|
| FLC-F        | TGTGGATAGCAAGCTTGTGG                   |
| FLC-R        | TAGTCACGGAGAGGGCAGTC                   |
| MAF1-F1      | ACATGCTGATGAACTTAGAGCCT                |
| MAF1-F2      | AGCCGGAGAAACCTCAATGT                   |
| MAF1-F3      | CCACACAAGGAGTTACTAGAAACAGTCC           |
| MAF1-R1      | GCCAGAACCTGGTTCTTCTCTCAG               |
| MAF2-F1      | CTTGCAGAAAAAAGCTCGGAATTATCTGCCAC       |
| MAF2-F2      | TAGCACAAAGACACTTTTATCTCCCTC            |
| MAF2-R1      | CCTAGCTCTAGTTACGGACAGAGCAGTC           |
| MAF3-F1      | TCGGAATTATCTTCCACACAAGGAG              |
| MAF3-R1      | GCCAGAATCTGGTTCTTCTATCAGC              |
| MAF3-R2      | GCCTAGCTTCCATCAAACCTCCT                |
| MAF3-R3      | CCAGAAACGTCTTCTTCCCCA                  |
| MAF4-F1      | TTGTGAATCCTCCGTCGCTC                   |
| MAF4-F2      | TCTTGATCTCTCCAGCATGGC                  |
| MAF4-F3      | TGGCCAAGATCCTCAGTCGTTATGA              |
| MAF4-F4      | TCCAAGAGCAGTGTTTGGGT                   |
| MAF4-F5      | GGAGCTTGTGAAGACCCATCA                  |
| MAF4-R1      | TGGCCATGAAATCTACCGGG                   |
| MAF4-R2      | TGCTGGTCTCTCTCCACAATG                  |
| MAF4-R3      | TCTAGCAACTCCTTGTGCGAA                  |
| MAF4-R4      | GCTGCTCTTCCAGGGACTTTAGACA              |
| MAF4-R5      | GCATAGCTAGGGATGGCGAA                   |
| MAF4-R6      | TACTTGAGAAGCAGGAGAGTCTCC               |
| MAF5-F1      | TCCATGGAAGAGCAGCTCAA                   |
| MAF5-F2      | GATGGAGCTTGTGAAGAACCTTCAGG             |
| MAF5-F3      | ACAAGCTGATGATCCTGAAACCT                |
| MAF5-R1      | CCACCTCGCTAGCTAGAACC                   |
| MAF5-R2      | CAGCCGTTGATGATTGGTGGTACTTG             |
| MAF5-R3      | ACAGACAGAGCACTCTTGAGC                  |
| MAS-F        | GTGATGGTGGTTACTTGAGAAGCA               |
| MAS-R        | AACTGAATAAAGTTGTGATGGTG                |
| MAF4-ChIP-F1 | GGCAGAAAAAGACTTGTTCGAGGCTGG            |
| MAF4-ChIP-R1 | GTGTGTTTTCCAAAAATCCAAAAATTTGAACCGAG    |
| MAF4-ChIP-F2 | CAAACGAATTGAGAACAAAAGCTCTCGACAAGT      |
| MAF4-ChIP-R2 | GCTGTAGAGTCTTCCGGTGGCAGA               |
| MAF4-ChIP-F3 | CAGTGGAAAGAAAATAGCATGTGTACACATTGAGTAGC |
| MAF4-ChIP-R3 | CGTACCAAATGTTTGTAGAGACTCAGTTTCTTTGG    |
| MAF4-ChIP-F4 | TTTCTTACAGATGGGGAAGATGAAGAAGTCTG       |
| MAF4-ChIP-R4 | GGTGATGGTGGTTACTTGAGAAGCAGGAG          |
| MAF5-ChIP-F1 | GCCCAGATTCGGCCATTTA                    |
| MAF5-ChIP-R1 | TGTCAATCGCGTACCCTGAA                   |
| MAF5-ChIP-F2 | TCGGAAGAGTGAAGCCATGG                   |
| MAF5-ChIP-R2 | ACGATGAAAAGAGCGACGGA                   |

MAF5-ChIP-F3                    GGGCCAAAAAGAGGTACCGA  
MAF5-ChIP-R3                    AGTGACAAGGACATCCCCAT

**Supplemental Table 2. Proteins involved in regulation of *FLC* clade members**

| Gene            | Locus     | Function                                                                                                                                                                    | Reference                                  |
|-----------------|-----------|-----------------------------------------------------------------------------------------------------------------------------------------------------------------------------|--------------------------------------------|
| FRI             | AT4G00650 | activates the transcription of <i>FLC</i> . FRI acts as a scaffold protein interacting with FRL1, FES1, SUF4, and FLX to form a transcription activator complex.            | (Johanson et al., 2000; Choi et al., 2011) |
| FRL1            | AT5G16320 | family member of FRI-related genes that is required for the winter-annual habit.                                                                                            | (Michaels et al., 2004)                    |
| FRL2            | AT1G31814 |                                                                                                                                                                             |                                            |
| SUF4            | AT1G30970 | component of FRI complex.                                                                                                                                                   | (Kim et al., 2006)                         |
| FLX             | AT2G30120 | component of FRI complex, required for FRI-dependent activation of <i>FLC</i> expression.                                                                                   | (Andersson et al., 2008)                   |
| FES1            | AT2G33835 | component of FRI complex.                                                                                                                                                   | (Schmitz et al., 2005)                     |
| ABH1/<br>CBP20  | AT2G13540 | suppress <i>FLC</i> expression.                                                                                                                                             | (Bezerra et al., 2004)                     |
| SWR1<br>complex |           | chromatin remodeling complex promotes the substitution of H2A by H2A.Z (the histone variant promotes transcription) at <i>FLC</i> , <i>MAF4</i> , and <i>MAF5</i> chromatin | (Cui et al., 2017)                         |
| SKIP            | AT1G77180 | activate the expression of <i>FLC</i> and <i>MAF4/5</i> .                                                                                                                   |                                            |
| PIE1            | AT3G33520 | component of the SWR1 complex.                                                                                                                                              |                                            |
| ARP             | AT2G41460 | component of the SWR1 complex.                                                                                                                                              |                                            |
| SEF             | AT5G37055 | component of the SWR1 complex.                                                                                                                                              |                                            |
| FER             | AT3G51550 | positively regulates the transcription of <i>FLC/MAF</i> .                                                                                                                  | (Wang et al., 2020)                        |
| HEN4            | AT5G64390 | promotes transcription of <i>FLC</i> and <i>MAF4</i> .                                                                                                                      | (Ortuño-Miquel et al., 2019)               |
| VOZ1            | AT1G28520 | inhibit transcription of <i>FLC/MAF</i> .                                                                                                                                   | (Yasui and Kohchi, 2014)                   |
| VOZ2            | AT2G42400 | inhibit transcription of <i>FLC/MAF</i> .                                                                                                                                   |                                            |
| FLY             | AT1G33680 | promotes transcription of <i>FLC</i> and <i>MAF</i> .                                                                                                                       | (Dai et al., 2020)                         |
| HUB1            | AT2G44950 | HUB1 and HUB2 interact with each other and with UBC1 and UBC2 to monoubiquitinate histone H2B and enhance H3K4 and H3K36                                                    | (Cao et al., 2008)                         |
| HUB2            | AT1G55250 |                                                                                                                                                                             |                                            |
| UBC1            | AT1G14400 |                                                                                                                                                                             |                                            |

---

|               |           |                                                                                                                                                                          |                      |
|---------------|-----------|--------------------------------------------------------------------------------------------------------------------------------------------------------------------------|----------------------|
| UBC2          | AT2G02760 | hypermethylation, increased <i>FLC/MAF</i> expression.                                                                                                                   |                      |
| HDA6          | AT5G63110 | binds to the chromatin of <i>FLC/MAF4</i> .                                                                                                                              | (Yu et al., 2011)    |
| TOP1 $\alpha$ | AT5G55300 | binds to the genomic regions of <i>FLC</i> , <i>MAF4</i> , and <i>MAF5</i> , facilitating the expression of <i>FLC</i> , <i>MAF4</i> , and <i>MAF5</i> .                 | (Gong et al., 2017)  |
| MLK4          | AT3G13670 | phosphorylates histone H3T3, repressing the transcription of <i>FLC/MAF</i> .                                                                                            | (Wang et al., 2021)  |
| DEK3          | AT4G26630 | directly associate with chromatin of <i>FLC</i> ,                                                                                                                        | (Zong et al., 2021)  |
| DEK4          | AT5G55660 | <i>MAF4</i> and <i>MAF5</i> , to promote their expression.                                                                                                               |                      |
| COMPASS-like  |           | The H3K4 methyltransferase including the core components Ash2, RbBP5 and WDR5 deposits H3K4me3 and promotes the expression of <i>FLC</i> , <i>MAF4</i> and <i>MAF5</i> . | (Jiang et al., 2011) |
| Ash2R         | AT1G51450 | component of COMPASS-like complex.                                                                                                                                       |                      |
| RbBP5         | AT3G21060 | component of COMPASS-like complex.                                                                                                                                       |                      |
| WDR5          | AT3G49660 | component of COMPASS-like complex.                                                                                                                                       |                      |

---
